# Supplementary material for: Characteristic patterns of inter- and intra-hemispheric metabolic connectivity in patients with stable and progressive mild cognitive impairment and Alzheimer’s disease
Source: PubMed Central journal article supplement (PMC6138637; doi:10.1038/s41598-018-31794-8), 2018-09-14
Supplement: 41598_2018_31794_MOESM1_ESM.pdf [file 41598_2018_31794_MOESM1_ESM.pdf]

# Characteristic patterns of inter- and intra-hemispheric metabolic connectivity in patients with stable and progressive mild cognitive impairment and Alzheimer's disease

Sheng-Yao Huang<sup>1</sup>, Jung-Lung Hsu<sup>2,3</sup>, Kun-Ju Lin<sup>1,4</sup>, Ho-Ling Liu<sup>5</sup>, Shiao-Pying Wey<sup>1</sup>, Ing-Tsung Hsiao<sup>1,4\*</sup> & Alzheimer's Disease Neuroimaging Initiative†

## Supplementary information

Table S1. Summary of subject information. Group demographics and clinical data at 6 months follow-up.

| Variable             | Mean ( $\pm$ SD)   |                    |                    |                   |
|----------------------|--------------------|--------------------|--------------------|-------------------|
|                      | NC                 | pMCI               | AD                 | sMCI              |
| No. subjects         | 100                | 56                 | 100                | 45                |
| Gender (male/female) | 61/39              | 35/21              | 58/42              | 32/13             |
| Age (years)          | 75.6 ( $\pm$ 4.3)  | 75.4 ( $\pm$ 6.4)  | 76 ( $\pm$ 6.7)    | 77.1 ( $\pm$ 7)   |
| Education (years)    | 15.1 ( $\pm$ 3.2)  | 15.8 ( $\pm$ 2.9)  | 15.5 ( $\pm$ 3.1)  | 14.8 ( $\pm$ 3.3) |
| Weight (kg)          | 75.5 ( $\pm$ 13.6) | 72.5 ( $\pm$ 15.9) | 76.1 ( $\pm$ 15.4) | 79.1 ( $\pm$ 13)  |
| MMSE                 | 29.1 ( $\pm$ 0.9)  | 26 ( $\pm$ 2.7)    | 21.9 ( $\pm$ 4)    | 27 ( $\pm$ 4.6)   |
| Global CDR           | 0.01 ( $\pm$ 0.1)  | 0.51 ( $\pm$ 0.1)  | 0.93 ( $\pm$ 0.5)  | 0.47 ( $\pm$ 0.1) |

Table S2. Nodes with significantly different SUVR in group comparison of NC, pMCI, AD and sMCI.

| Comparsion | Features (90 nodes)                                                             | No. |
|------------|---------------------------------------------------------------------------------|-----|
| NC-sMCI    | 16, 20, 28, 40, 42, 43, 58, 61, 65, 73, 87, 88                                  | 12  |
| NC-pMCI    | 1-28, 30-34, 36, 38-43, 47-54, 56-66, 68, 70, 71, 73, 75-79, 81-86, 88-89       | 76  |
| NC-AD      | 2-8, 12-20, 23, 25-28, 30-34, 38-44, 47-52, 57-65, 68, 70, 71, 73, 75-79, 83-88 | 63  |
| sMCI-pMCI  | 2-5, 17-18,31, 33, 34, 37, 41, 43, 49, 50, 52, 64, 78-79, 82-84                 | 21  |
| sMCI-AD    | 4, 18, 20, 30, 31, 33, 34, 41, 43, 63, 64, 76, 78, 79, 86, 88                   | 16  |
| pMCI-AD    | 37, 54, 74, 80, 82                                                              | 5   |

Table S3. Number of edges for inter and intra-hemispheric network for each group.

| Disease (No. Nodes) | No. Edges |     |     | Total |
|---------------------|-----------|-----|-----|-------|
|                     | L-L       | R-R | L-R |       |
| NC (90)             | 138       | 111 | 180 | 429   |
| sMCI (88)           | 114       | 107 | 169 | 390   |
| pMCI (85)           | 73        | 70  | 105 | 248   |
| AD (86)             | 78        | 57  | 36  | 171   |

**L-L:** Left intra-hemisphere, **R-R:** Right intra-hemisphere, and **L-R: Left and right inter-hemisphere**

Table S4. Number of edges rate for Left Hemispheric network.

| Left Hemispheric<br>(No.edges rate) | $(sMCI-NC)/NC$ | $(pMCI-sMCI)/sMCI$ |
|-------------------------------------|----------------|--------------------|
| temporal-occipital                  | 1.5            | -1                 |
| temporal-frontal                    | -0.6           | -0.5               |
| parietal-occipital                  | -0.5           | 1.5                |

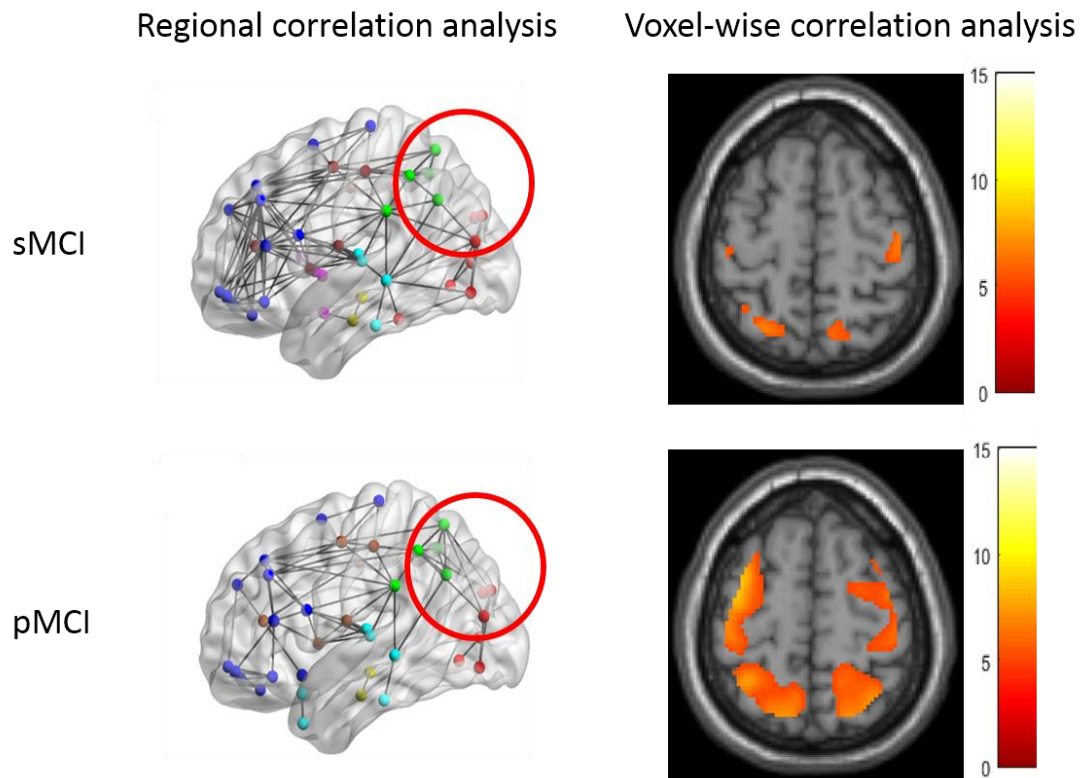

Figure S1. Comparison between regional and voxel-wise correlation analysis in parietal lobe of sMCI and pMCI. The right side was showed our finding result. Another side, we used voxel-wise correlation analysis and the significance threshold:  $p < 0.05$ , correlation for multiple comparison (FWE with MMSE). The chose region (red cicle part) is left occipital-parietal connectivity.

Regional correlation analysis

Voxel-wise correlation analysis

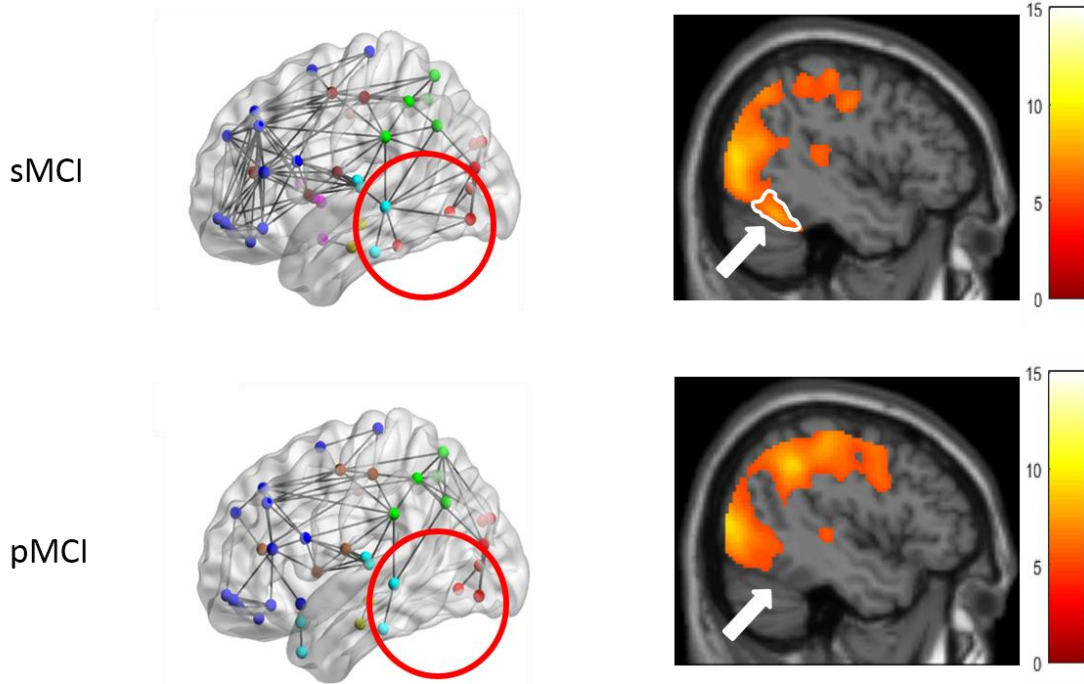

Figure S2. Comparison between regional and voxel-wise correlation analysis in temporal lobe of sMCI and pMCI. The right side showed our finding result. Another side, we used voxel-wise correlation analysis and the significance threshold:  $p < 0.05$ , correlation for multiple comparison (FWE with MMSE). The chosen region (red circle part) is left occipital-temporal connectivity. The white areas are temporal lobe.
